# Supplementary material for: KRAS‐Mutated, Estrogen Receptor‐Positive Low‐Grade Serous Ovarian Cancer: Unraveling an Exceptional Response Mystery
Source: PubMed Central journal article supplement — Oncologist. 2021 Mar 2;26(4):e530–6. doi: 10.1002/onco.13702 (PMC8018312; doi:10.1002/onco.13702), 2021-03-02
Supplement: ONCO-26-e530-s001.pdf [file ONCO-26-e530-s001.pdf]

Supplemental Figure for:  
KRAS-mutated, ER-positive low-grade serous ovarian cancer Unraveling an exceptional response mystery  
Shumei Kato et al.

**Figure S1.**

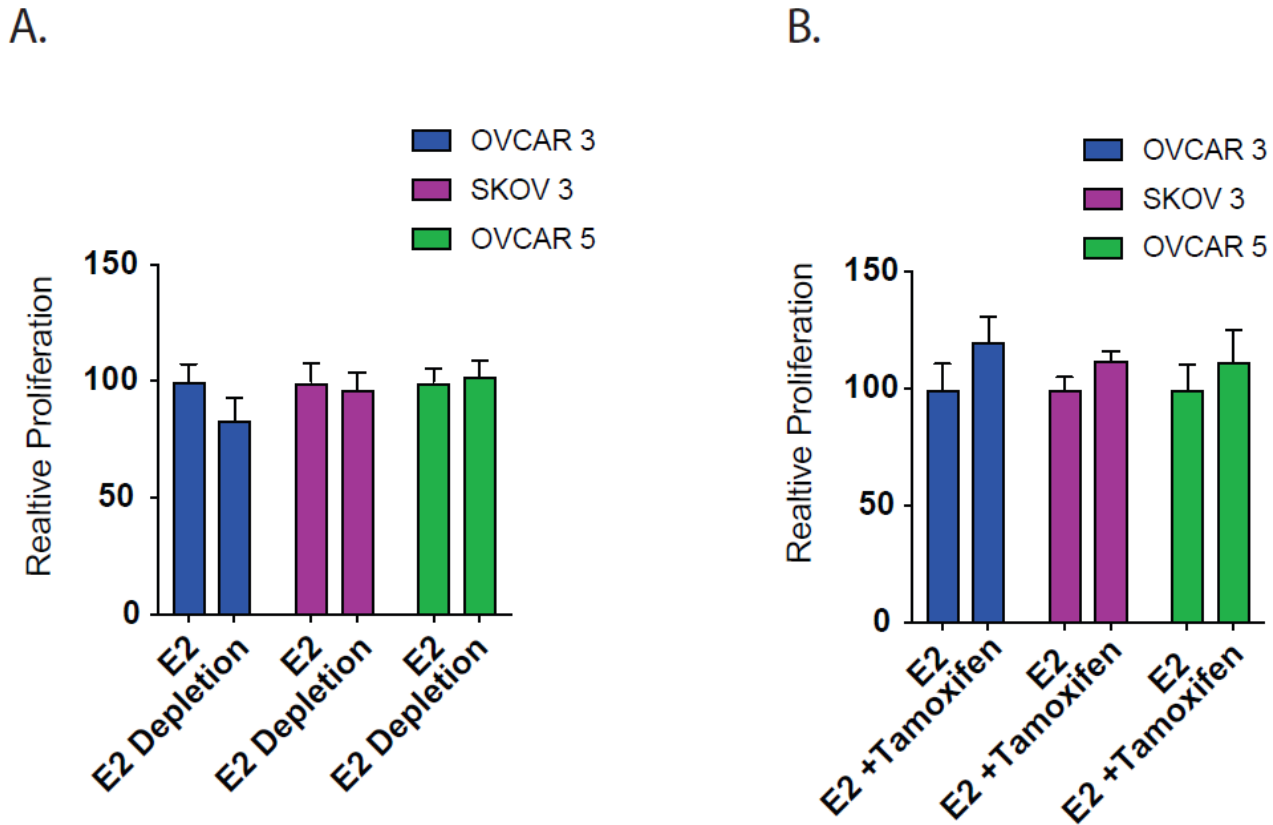

**(A)** OVCAR3 (ER+), SKOV3 (ER+), and OVCAR5 (ER-) cells were grown in hormone stripped cell culture media containing FBS (which contains EGF) for 48 hours prior to seeding. Cells were either continually grown in hormone stripped phenol-free media, or hormone stripped phenol-free media supplemented with 10nM 17-B-estradiol for 48 hours. Cell proliferation was measured by MTT assay. Data is representative of eight biological replicates. Histograms represent means and error bars represent standard deviation. The results show that all three cell lines were not sensitive to estradiol depletion.

**(B)** SKOV3, OVCAR3 and OVCAR5 cells were grown in hormone stripped cell culture media containing FBS (which contains EGF) for 48 hours prior to seeding. Cells were either continually grown in hormone stripped phenol-free media supplemented with 10nM 17-B-estradiol, or hormone stripped phenol-free media supplemented with 10nM 17-B-estradiol in combination with 10nM tamoxifen for 48 hours. Cell proliferation was measured by MTT assay. Data is representative of eight biological replicates. Histograms represent means and error bars represent standard deviation.

The results show that all three cell lines were not sensitive to monotherapy with tamoxifen.

**Abbreviations:** E2, estradiol
